# Supplementary material
Source: PubMed Central journal article supplement (PMC6211635)
Supplement: NIHMS80167-supplement-Supporting_information.pdf [file NIHMS80167-supplement-Supporting_information.pdf]

# Tchnetium-99m and rhenium-188 complexes with one and two pendant bisphosphonate groups for imaging arterial calcification

Jayanta Kumar Bordoloi <sup>a, b</sup>, David Berry <sup>a</sup>, Irfan Ullah Khan <sup>a, c</sup>, Kavitha Sunassee <sup>a</sup>, Rafael T.M. de Rosales <sup>a</sup>, Catherine Shanahan <sup>b</sup>, Philip J. Blower <sup>a</sup>.

## Supplemental Information

Mass spectrometry data: Table of values for rhenium species.

| Voltage | Formula                                                                                                           | Estimated Species        | m/z (Calculated) | m/z (Found) | intensity | Potential structure              |
|---------|-------------------------------------------------------------------------------------------------------------------|--------------------------|------------------|-------------|-----------|----------------------------------|
| 325     | C <sub>10</sub> H <sub>24</sub> N <sub>3</sub> O <sub>14</sub> P <sub>4</sub> S <sub>4</sub> [ <sup>185</sup> Re] | (M-H) <sup>-</sup>       | 845.8548         | 845.8705    |           | 8 ReN(DTC-BP) <sub>2</sub>       |
|         |                                                                                                                   | (M-2H+Na) <sup>-</sup>   | 867.8368         | 867.8520    |           | 8 ReN(DTC-BP) <sub>2</sub>       |
|         |                                                                                                                   | (M-3H+2Na) <sup>-</sup>  | 889.8187         | 889.8345    |           | 8 ReN(DTC-BP) <sub>2</sub>       |
| 325     | C <sub>10</sub> H <sub>24</sub> N <sub>3</sub> O <sub>14</sub> P <sub>4</sub> S <sub>4</sub> [ <sup>187</sup> Re] | (M-H) <sup>-</sup>       | 847.8576         | 847.8721    | 1.05e4    | 8 ReN(DTC-BP) <sub>2</sub>       |
|         |                                                                                                                   | (M-2H+Na) <sup>-</sup>   | 869.8396         | 869.8517    |           | 8 ReN(DTC-BP) <sub>2</sub>       |
|         |                                                                                                                   | (M-3H+2Na) <sup>-</sup>  | 891.8215         | 891.8341    |           | 8 ReN(DTC-BP) <sub>2</sub>       |
| 125     | C <sub>10</sub> H <sub>24</sub> N <sub>3</sub> O <sub>14</sub> P <sub>4</sub> S <sub>4</sub> [ <sup>185</sup> Re] | (M-2H) <sup>2-</sup>     | 422.4238         | 422.4115    |           | 8 ReN(DTC-BP) <sub>2</sub>       |
|         |                                                                                                                   | (M-3H+Na) <sup>2-</sup>  | 433.4148         | 433.4037    |           | 8 ReN(DTC-BP) <sub>2</sub>       |
|         |                                                                                                                   | (M-4H+2Na) <sup>2-</sup> | 444.4057         | 444.3914    |           | 8 ReN(DTC-BP) <sub>2</sub>       |
| 125     | C <sub>10</sub> H <sub>24</sub> N <sub>3</sub> O <sub>14</sub> P <sub>4</sub> S <sub>4</sub> [ <sup>187</sup> Re] | (M-2H) <sup>2-</sup>     | 423.4252         | 423.4129    | 2.1e4     | 8 ReN(DTC-BP) <sub>2</sub>       |
|         |                                                                                                                   | (M-3H+Na) <sup>2-</sup>  | 434.4161         | 434.4033    |           | 8 ReN(DTC-BP) <sub>2</sub>       |
|         |                                                                                                                   | (M-4H+2Na) <sup>2-</sup> | 445.4071         | 445.3949    |           | 8 ReN(DTC-BP) <sub>2</sub>       |
| 125     | C <sub>16</sub> H <sub>36</sub> N <sub>6</sub> O <sub>14</sub> P <sub>5</sub> S <sub>4</sub> [ <sup>185</sup> Re] | (M-H) <sup>-</sup>       | 1002.9317        | 1002.8885   |           | 9 ReN(DTC-BP) <sub>2</sub> (PTA) |
|         |                                                                                                                   | (M-2H+Na) <sup>-</sup>   | 1024.9137        | 1024.8689   |           | 9 ReN(DTC-BP) <sub>2</sub> (PTA) |
|         |                                                                                                                   | (M-3H+2Na) <sup>-</sup>  | 1046.8956        | 1046.8472   |           | 9 ReN(DTC-BP) <sub>2</sub> (PTA) |
| 125     | C <sub>16</sub> H <sub>36</sub> N <sub>6</sub> O <sub>14</sub> P <sub>5</sub> S <sub>4</sub> [ <sup>187</sup> Re] | (M-H) <sup>-</sup>       | 1004.9345        | 1004.8907   | 8e3       | 9 ReN(DTC-BP) <sub>2</sub> (PTA) |
|         |                                                                                                                   | (M-2H+Na) <sup>-</sup>   | 1026.9165        | 1026.8724   |           | 9 ReN(DTC-BP) <sub>2</sub> (PTA) |
|         |                                                                                                                   | (M-3H+2Na) <sup>-</sup>  | 1048.8984        | 1048.8549   |           | 9 ReN(DTC-BP) <sub>2</sub> (PTA) |
| 125     | C <sub>16</sub> H <sub>36</sub> N <sub>6</sub> O <sub>14</sub> P <sub>5</sub> S <sub>4</sub> [ <sup>185</sup> Re] | (M-2H) <sup>2-</sup>     | 500.9622         | 500.9456    |           | 9 ReN(DTC-BP) <sub>2</sub> (PTA) |
|         |                                                                                                                   | (M-3H+Na) <sup>2-</sup>  | 511.9532         | 511.9358    |           | 9 ReN(DTC-BP) <sub>2</sub> (PTA) |
|         |                                                                                                                   | (M-4H+2Na) <sup>2-</sup> | 522.9442         | 522.9283    |           | 9 ReN(DTC-BP) <sub>2</sub> (PTA) |
| 125     | C <sub>16</sub> H <sub>36</sub> N <sub>6</sub> O <sub>14</sub> P <sub>5</sub> S <sub>4</sub> [ <sup>187</sup> Re] | (M-2H) <sup>2-</sup>     | 501.9636         | 501.9477    | ?         | 9 ReN(DTC-BP) <sub>2</sub> (PTA) |
|         |                                                                                                                   | (M-3H+Na) <sup>2-</sup>  | 512.9546         | 512.9398    |           | 9 ReN(DTC-BP) <sub>2</sub> (PTA) |
|         |                                                                                                                   | (M-4H+2Na) <sup>2-</sup> | 523.9456         | 523.9248    |           | 9 ReN(DTC-BP) <sub>2</sub> (PTA) |
| 125     | C <sub>15</sub> H <sub>36</sub> N <sub>4</sub> O <sub>21</sub> P <sub>6</sub> S <sub>6</sub> [ <sup>185</sup> Re] | (M-H) <sup>-</sup>       | 1169.8079        | 1169.8819   |           | 10 ReN(DTC-BP) <sub>3</sub>      |
| 125     | C <sub>15</sub> H <sub>36</sub> N <sub>4</sub> O <sub>21</sub> P <sub>6</sub> S <sub>6</sub> [ <sup>187</sup> Re] | (M-H) <sup>-</sup>       | 1171.8107        | 1171.8859   | 1.7e4     | 10 ReN(DTC-BP) <sub>3</sub>      |

Table S1. Full mass spectrometry results of Re complexes.

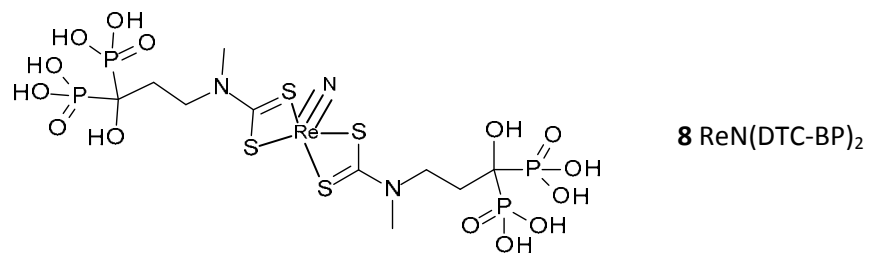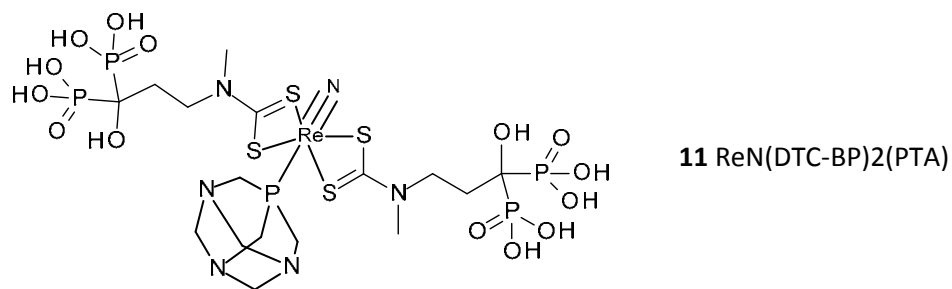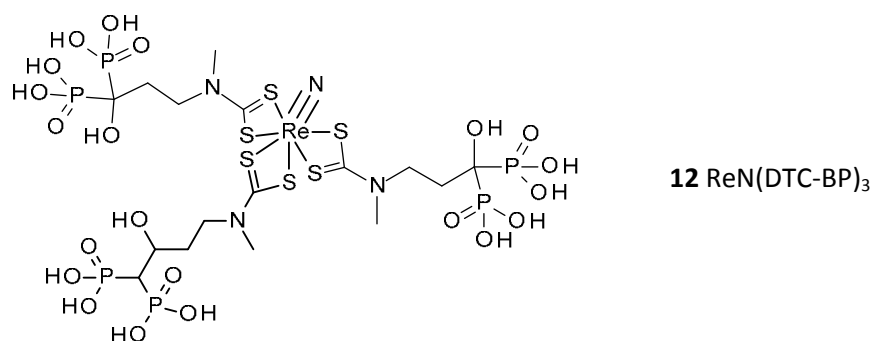

**Figure S1.** Indicated structures from mass spectrometry results.

**At 125V:**

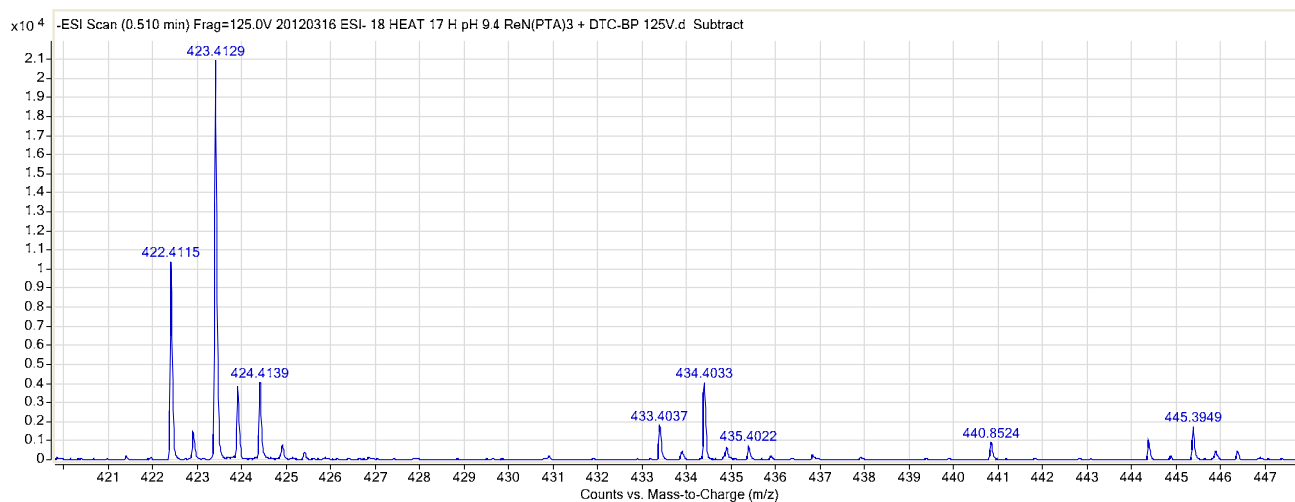

**Figure S2.** Indicates  $6 [\text{ReN}(\text{DTC-BP})_2] (\text{M}-2\text{H})^2$  and sodium adducts at 125V.

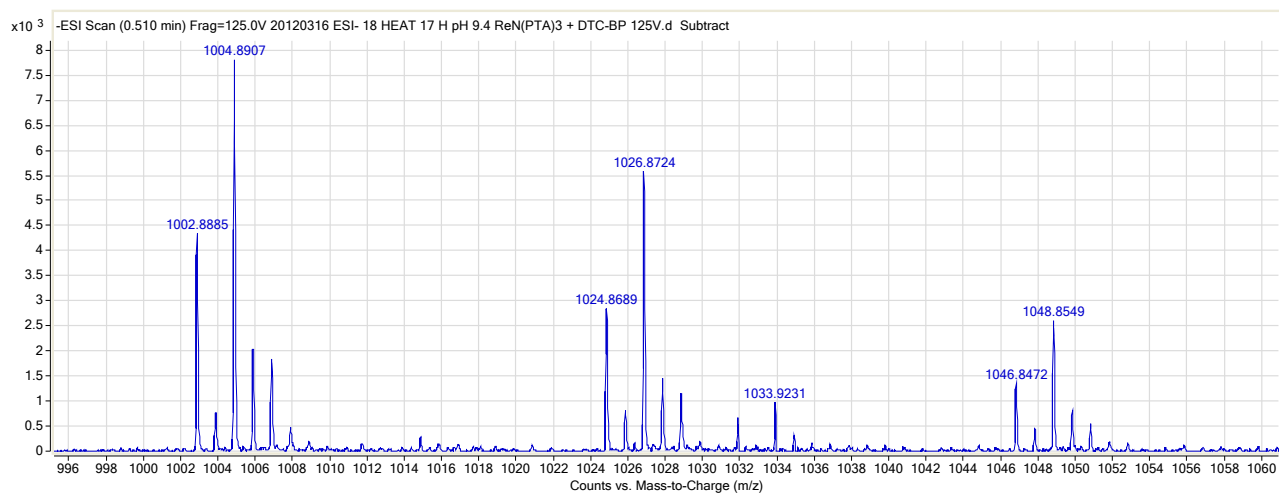

Figure S3. Indicates **9** [ReN(DTC-BP)<sub>2</sub>(PTA)] (M-H)<sup>-</sup> and sodium adducts at 125V.

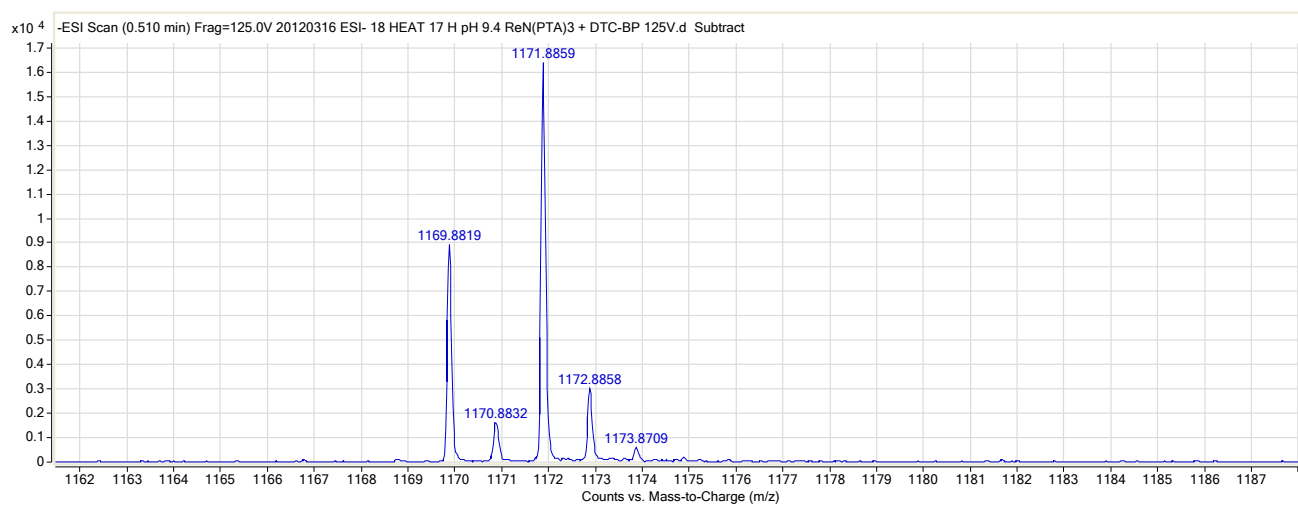

Figure S4. Indicates **10** [ReN(DTC-BP)<sub>3</sub>] (M-H)<sup>-</sup> at 125V.

### At 325V.

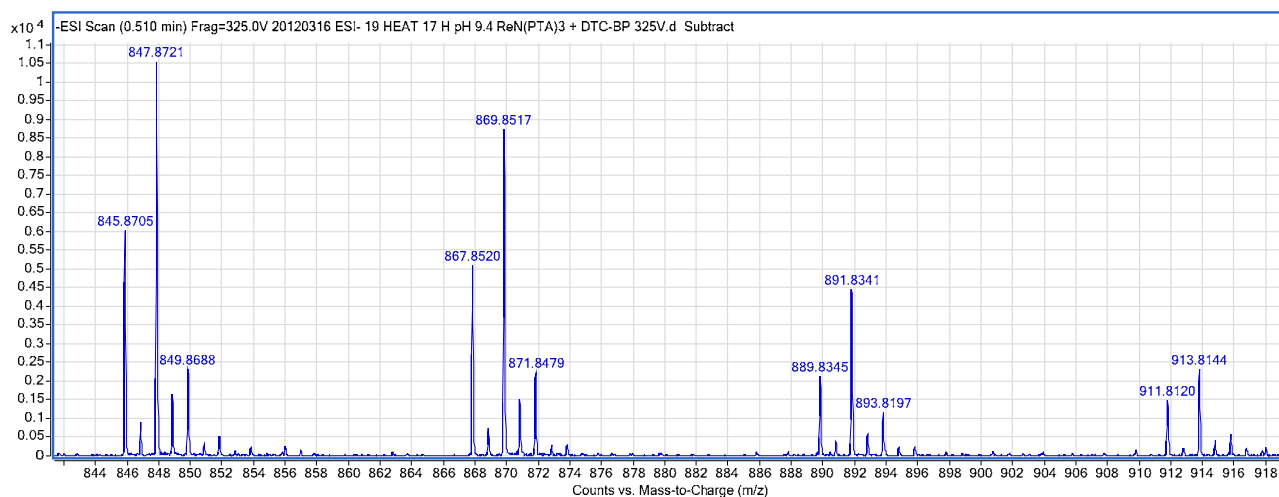

Figure S5. Indicates **Re-6** [ReN(DTC-BP)<sub>2</sub>] (M-H)<sup>-</sup> and sodium adducts at 325V.

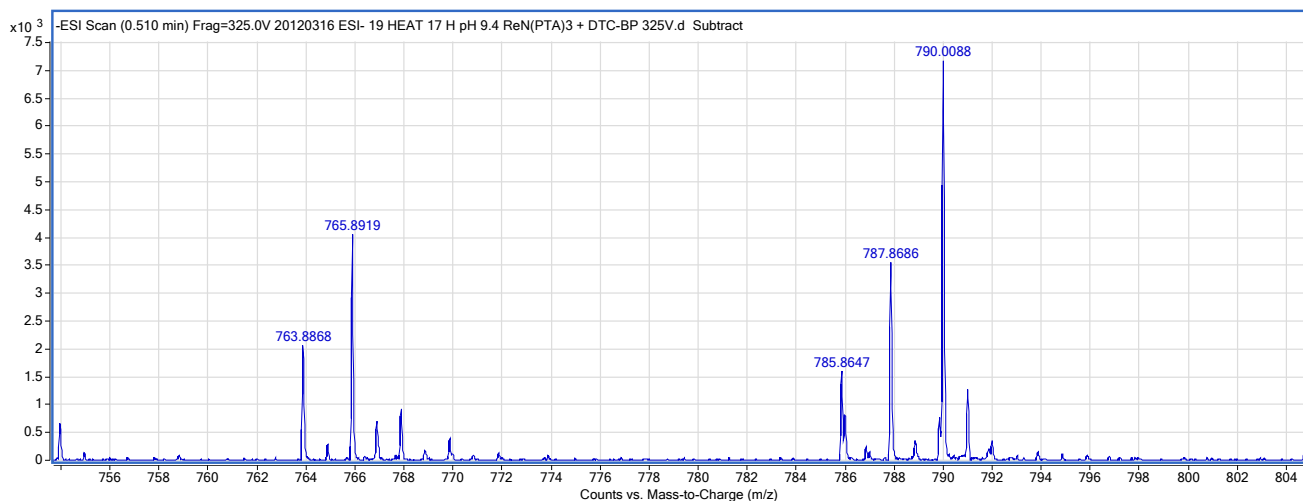

Figure S6. Unknown rhenium containing species and weak abundance potential sodium adduct at 325V.

### Table of values for $^{99}\text{Tc}$ data

| Voltage | Formula                                                                                 | Estimated Species                   | m/z (Calculated) | m/z (Found) | Error (ppm) | Potential structure                        |
|---------|-----------------------------------------------------------------------------------------|-------------------------------------|------------------|-------------|-------------|--------------------------------------------|
| 250     | $\text{C}_{10}\text{H}_{24}\text{N}_3\text{O}_{14}\text{P}_4\text{S}_4[^{99}\text{Tc}]$ | $(\text{M}-\text{H})^-$             | 759.8082         | 759.8003    | 10.4        | $7^{99}\text{TcN}(\text{DTC}-\text{BP})_2$ |
|         |                                                                                         | $(\text{M}-2\text{H}+\text{Na})^-$  | 781.7901         | 781.7815    | 11.0        | $7^{99}\text{TcN}(\text{DTC}-\text{BP})_2$ |
|         |                                                                                         | $(\text{M}-3\text{H}+2\text{Na})^-$ | 803.7721         | 803.7624    | 12.1        | $7^{99}\text{TcN}(\text{DTC}-\text{BP})_2$ |
| 175     | $\text{C}_{10}\text{H}_{24}\text{N}_3\text{O}_{14}\text{P}_4\text{S}_4[^{99}\text{Tc}]$ | $(\text{M}-2\text{H})^{2-}$         | 379.4005         | 379.3972    | 8.7         | $7^{99}\text{TcN}(\text{DTC}-\text{BP})_2$ |
|         |                                                                                         | $(\text{M}-\text{H})^-$             | 759.8082         | 759.8008    | 9.7         | $7^{99}\text{TcN}(\text{DTC}-\text{BP})_2$ |
|         |                                                                                         | $(\text{M}-2\text{H}+\text{Na})^-$  | 781.7901         | 781.7824    | 9.9         | $7^{99}\text{TcN}(\text{DTC}-\text{BP})_2$ |

Table S2. Mass spectrometry results of  $^{99}\text{Tc}$  complex.

### Spectra:

#### At 250V:

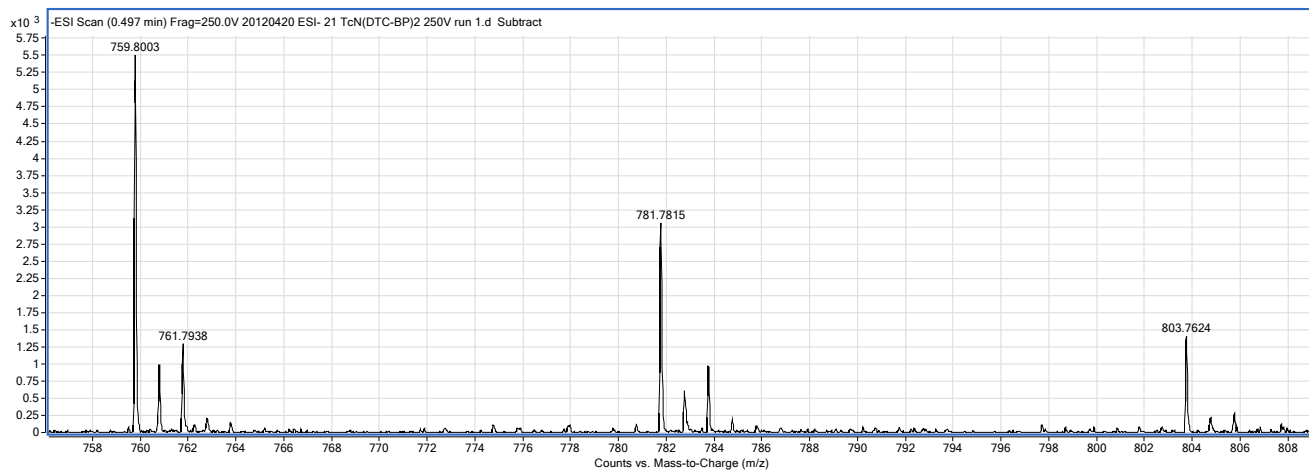

Figure S7. Indicates  $^{99}\text{Tc}-6$   $(\text{M}-\text{H})^-$  and sodium adduct.

*In vivo* imaging with calcified rat model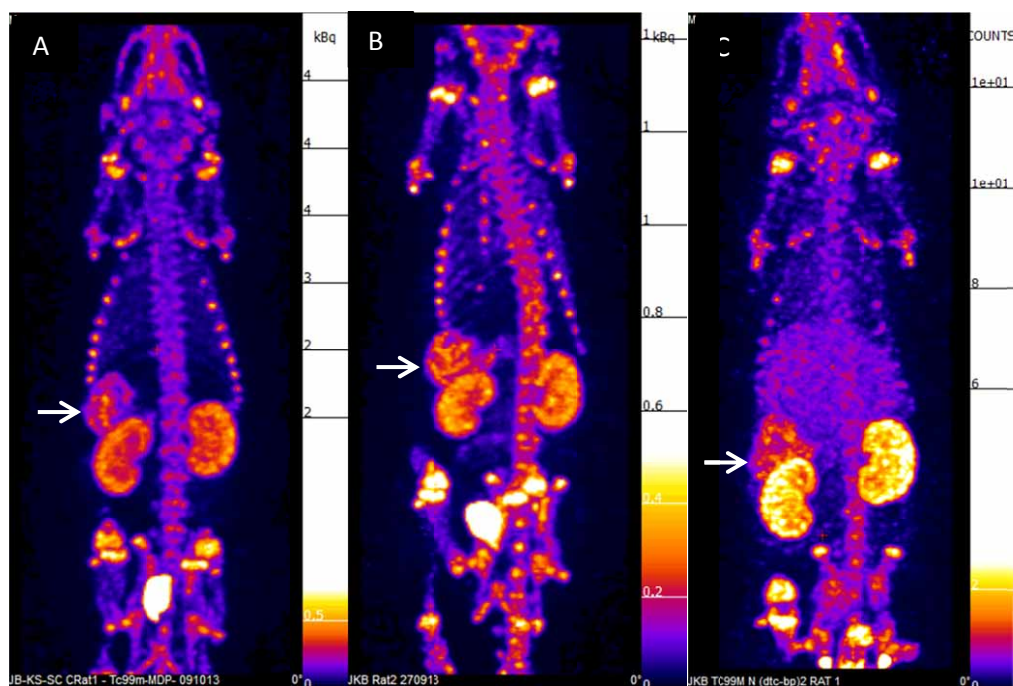

3 and (C)  
lly joints

**Histology**

Tissues excised from rats sacrificed (by over dose of anaesthesia) after SPECT-CT scan were treated with 4% formaldehyde for 4 hours. The tissues were then transferred to 70% ethanol, processed in an automated tissue processor (Shandon Hypercenter XP) and embedded in paraffin. Sections (5  $\mu\text{m}$  thick) were cut in a microtome and stained with Alizarin red S and Von-Kossa to detect the presence of calcification.

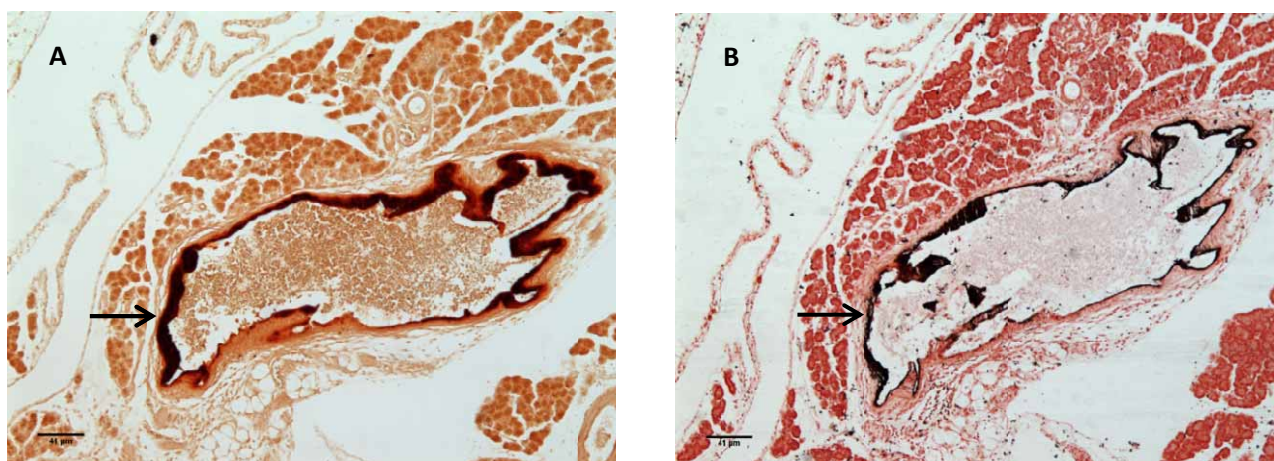

(alizarin red-

**Figure S10:** Biodistribution of  $^{188}\text{Re}$  in mice ( $n = 3$ ) 24 h after i.v. injection of [ $^{188}\text{Re}$ ]-**8** (relative activity per gram of tissue)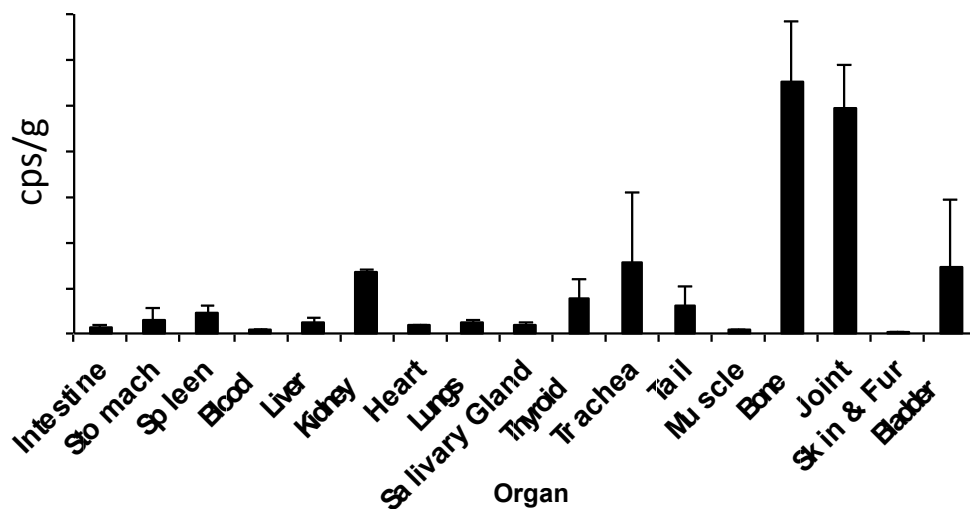**Figure S11:** logP data for  $^{99\text{m}}\text{Tc}$ -bisphosphonate derivatives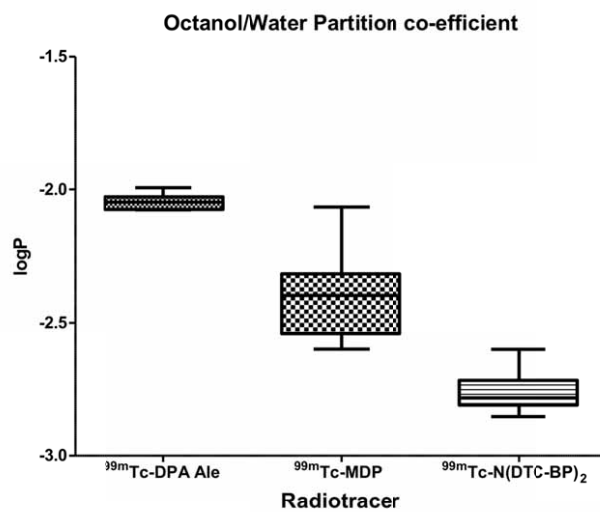

| n=9            | $^{99\text{m}}\text{Tc}$ -DPA Ale | $^{99\text{m}}\text{Tc}$ -MDP | $^{99\text{m}}\text{Tc}$ -N(DTCBP) <sub>2</sub> |
|----------------|-----------------------------------|-------------------------------|-------------------------------------------------|
| Mean           | -2.048                            | -2.397                        | -2.762                                          |
| Std. Deviation | 0.02825                           | 0.1631                        | 0.07612                                         |
| Std. Error     | 0.009415                          | 0.05435                       | 0.02537                                         |
